# Supplementary material for: Mitochondrial DNA variation and phylogeography of native Mongolian goats
Source: PubMed Central journal article supplement (PMC7206382; doi:10.5713/ajas.19.0396), 2019-10-21
Supplement: ajas-19-0396-suppl.pdf [file ajas-19-0396-suppl.pdf]

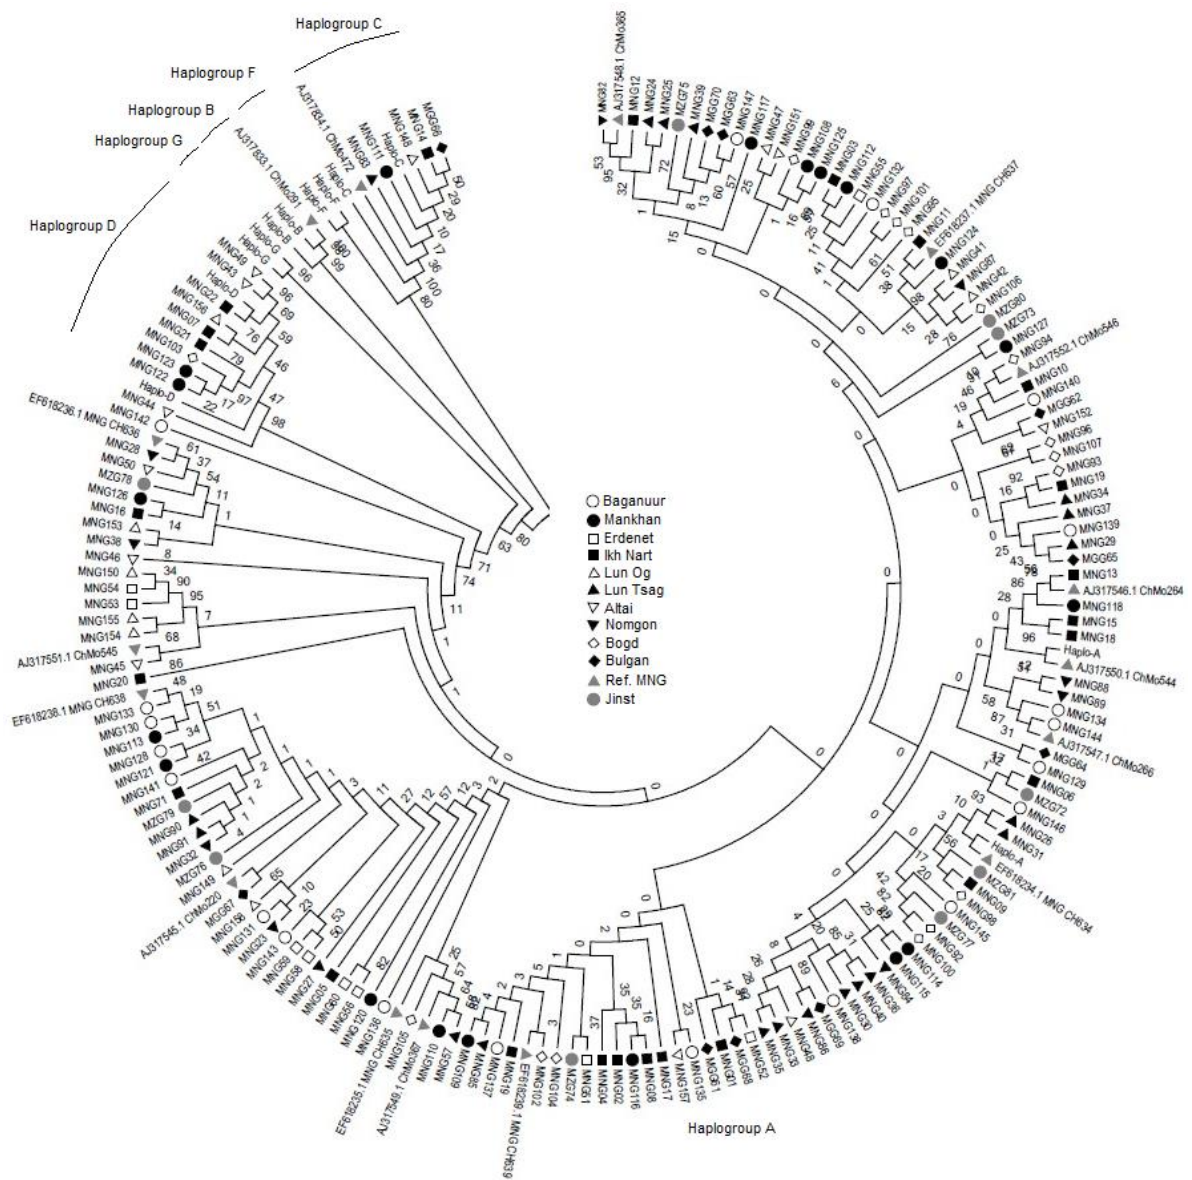

Supplementary Figure S1. Neighbor-joining (NJ) trees for 12 MG populations

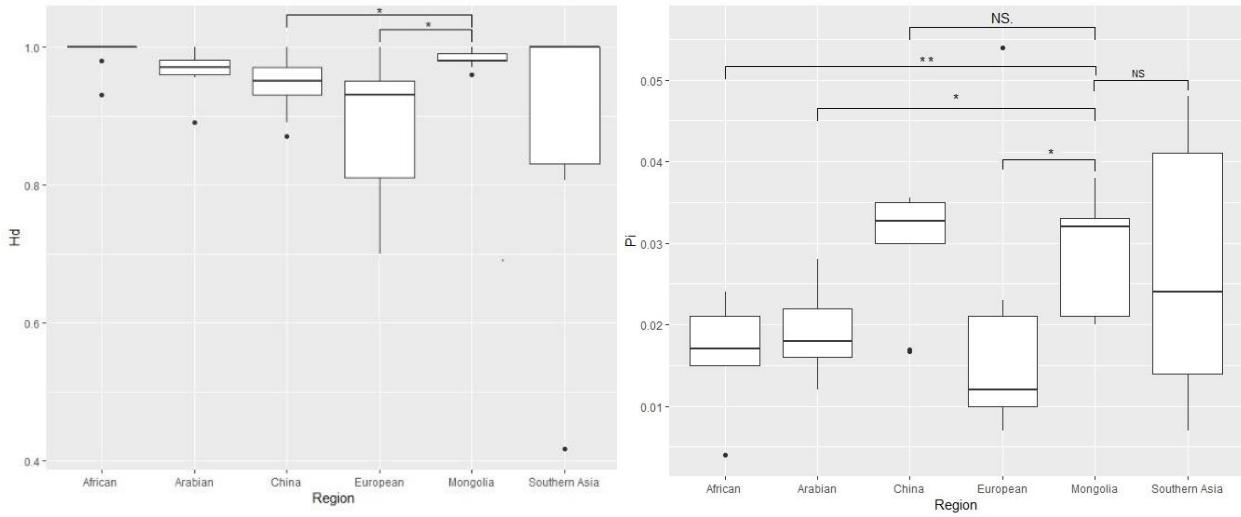

**Supplementary Figure S2.** Boxplot for comparisons of haplotype ( $H_d$ , left) and nucleotide diversity ( $\pi$ , right) of goat populations from different geographical regions (using R packages “ggplot2” and “ggsignif”). Haplotype and nucleotide diversity values were calculated based on same 452 bp long HVI region for all populations from different region.

**Supplementary Table S1.** Accession numbers and other information of reference sequences that retrieved from Genbank for this study.

| Breeds                | ID        | No. of samples | Ref.                  | Region        | Accession numbers                                                                                                                                                                     |
|-----------------------|-----------|----------------|-----------------------|---------------|---------------------------------------------------------------------------------------------------------------------------------------------------------------------------------------|
| Gondar                | GO        | 20             | Tarekegn et al., 2017 | African       | KY747819, KY747841, KY747847, KY747849, KY747859, KY747873, KY747879, KY747882, KY747890, KY747901, KY747918, KY747920, KY747922, KY747968, KY747973-75, KY747977, KY747989, KY747993 |
| Kenyan native goat    | KG        | 21             | Kibegwa et al., 2016  | African       | KP120622- KP120642                                                                                                                                                                    |
| Turkey goat           | TG        | 15             | Luikart et al., 2001  | Arabian       | AJ317737- AJ317751                                                                                                                                                                    |
| Baladi                | Ba        | 14             | Naderi et al., 2007   | Arabian       | EF618191- EF618204                                                                                                                                                                    |
| Batinah               | Bat       | 12             | Othmen et al., 2016   | Arabian       | KY399058- KY399069                                                                                                                                                                    |
| Beeshi                | Be        | 15             | Naderi et al., 2007   | Arabian       | EF618309- EF618330                                                                                                                                                                    |
| Arbi                  | Ar        | 10             | Vacca et al., 2010    | Arabian       | FJ571562- FJ571571                                                                                                                                                                    |
| Chengduma             | Che       | 13             | Ruo et al., 2006      | China         | DQ121506- DQ121518                                                                                                                                                                    |
| Guizhou black         | GuB       | 12             | Ruo et al., 2006      | China         | DQ121521- DQ121532                                                                                                                                                                    |
| Huanghuai             | Hua       | 12             | Ruo et al., 2006      | China         | DQ121550- DQ121561                                                                                                                                                                    |
| Leizhou               | Lei       | 13             | Ruo et al., 2006      | China         | DQ121564- DQ121576                                                                                                                                                                    |
| Shaanen white         | SNW       | 15             | Ruo et al., 2006      | China         | DQ121604- DQ121618                                                                                                                                                                    |
| Korean native goat    | KNG       | 6              | Odahara et al., 2006  | East Asian    | DQ217780- DQ217785                                                                                                                                                                    |
| Mongolian native goat | Ref.      | 16             | Luikart et al., 2001  | East Asian    | AJ317833- AJ317552                                                                                                                                                                    |
| Majorera              | MJ        | 21             | Amillis et al., 2004  | European      | AY424919, AY424921-22, AY424928, AY424933, AY424940-43, AY424949, KM893157, KM893159, KM893230, KM893233-34, KM893236, KM893241, KM893243, KM893293, KM893308-10.                     |
| Derivata di Siria     | DdS       | 10             | Sardina et al., 2006  | European      | DQ241363- DQ241371                                                                                                                                                                    |
| Gergentana            | Ger       | 16             | Sardina et al., 2006  | European      | DQ241332- DQ241347                                                                                                                                                                    |
| Maltese               | ML        | 11             | Sardina et al., 2006  | European      | DQ241352- DQ241362                                                                                                                                                                    |
| Pinalera              | Pin       | 13             | Ferrando et al., 2015 | European      | KM893154-56, KM893306, KM893200-17                                                                                                                                                    |
| Indian native goat    | IG        | 12             | Joshi et al., 2004    | Southern Asia | AY155681-85, AY155707-09, AY155834-36, AY155876-82, AY155952-54, AY156000-01                                                                                                          |
| Iran native goat      | ING       | 15             | Naderi et al., 2007   | Southern Asia | EF618070- EF618084                                                                                                                                                                    |
| Loas native goat      | LOG       | 10             | Mannen et al., 2001   | Southern Asia | AB044295- AB044304                                                                                                                                                                    |
| Pakistan goats-1      | PG        | 14             | Sultana et al., 2003  | Southern Asia | AB110553-64, AB110571, AB110587, AB110589                                                                                                                                             |
| Kazakstan goat        | Kag       | 6              | Naderi et al., 2007   | Central Asian | EF618205- EF618210                                                                                                                                                                    |
| Kyrgyz goat           | Kyg       | 8              | Naderi et al., 2007   | Central Asian | EF618212- EF618219                                                                                                                                                                    |
| Haplogroup A          | HA        | 1              | AY155721              | -             |                                                                                                                                                                                       |
| Haplogroup A          | HA        | 1              | EF618134              | -             |                                                                                                                                                                                       |
| Haplogroup B          | HB        | 1              | AB044303              | -             |                                                                                                                                                                                       |
| Haplogroup B          | HB        | 1              | AJ317833              | -             |                                                                                                                                                                                       |
| Haplogroup C          | HC        | 1              | EF618413              | -             |                                                                                                                                                                                       |
| Haplogroup C          | HC        | 1              | AY155708              | -             |                                                                                                                                                                                       |
| Haplogroup D          | HD        | 1              | DQ188893              | -             |                                                                                                                                                                                       |
| Haplogroup D          | HD        | 1              | AY155952              | -             |                                                                                                                                                                                       |
| Haplogroup G          | HG        | 1              | EF618084              | -             |                                                                                                                                                                                       |
| Haplogroup G          | HG        | 1              | EF618535              | -             |                                                                                                                                                                                       |
| Haplogroup F          | HF        | 1              | DQ241349              | -             |                                                                                                                                                                                       |
| Haplogroup F          | HF        | 1              | DQ241351              | -             |                                                                                                                                                                                       |
| <i>C. aegagrus</i>    | -         | 1              | AJ317864              | -             |                                                                                                                                                                                       |
| <i>C. sibirica</i>    | -         | 1              | AJ317874              | -             |                                                                                                                                                                                       |
| <i>C. falconeri</i>   | -         | 1              | AB044305              | -             |                                                                                                                                                                                       |
|                       | <b>36</b> | <b>503</b>     |                       |               |                                                                                                                                                                                       |



|             |   |  |  |  |   |   |   |   |   |   |   |   |          |
|-------------|---|--|--|--|---|---|---|---|---|---|---|---|----------|
| <b>h54</b>  |   |  |  |  | 1 |   |   |   |   |   |   |   | <b>1</b> |
| <b>h55</b>  |   |  |  |  | 1 |   |   |   |   |   |   |   | <b>1</b> |
| <b>h56</b>  |   |  |  |  | 1 |   |   |   |   |   | 1 |   | <b>2</b> |
| <b>h57</b>  |   |  |  |  | 1 |   |   |   |   |   |   |   | <b>1</b> |
| <b>h58</b>  |   |  |  |  | 1 |   | 1 |   |   |   |   |   | <b>2</b> |
| <b>h59</b>  |   |  |  |  | 1 |   |   |   |   |   |   |   | <b>1</b> |
| <b>h60</b>  | 1 |  |  |  |   | 1 | 2 |   |   |   |   |   | <b>4</b> |
| <b>h61</b>  |   |  |  |  |   | 1 |   |   |   |   |   |   | <b>1</b> |
| <b>h62</b>  |   |  |  |  |   | 1 |   |   |   |   |   |   | <b>1</b> |
| <b>h63</b>  |   |  |  |  |   | 1 |   |   |   |   |   |   | <b>1</b> |
| <b>h64</b>  |   |  |  |  |   | 1 |   |   |   |   |   |   | <b>1</b> |
| <b>h65</b>  |   |  |  |  |   | 1 |   |   |   |   |   |   | <b>1</b> |
| <b>h66</b>  |   |  |  |  |   | 1 |   | 2 |   |   |   |   | <b>3</b> |
| <b>h67</b>  |   |  |  |  |   | 1 |   |   |   |   |   |   | <b>1</b> |
| <b>h68</b>  |   |  |  |  |   | 1 |   |   |   |   |   |   | <b>1</b> |
| <b>h69</b>  |   |  |  |  |   | 1 |   |   |   |   |   |   | <b>1</b> |
| <b>h70</b>  |   |  |  |  |   |   | 1 |   |   |   |   |   | <b>1</b> |
| <b>h71</b>  |   |  |  |  |   |   | 1 |   |   |   |   |   | <b>1</b> |
| <b>h72</b>  |   |  |  |  |   |   | 1 |   |   |   |   |   | <b>1</b> |
| <b>h73</b>  |   |  |  |  |   |   | 1 |   |   |   |   |   | <b>1</b> |
| <b>h74</b>  |   |  |  |  |   |   | 2 |   |   |   |   |   | <b>2</b> |
| <b>h75</b>  |   |  |  |  |   |   |   | 1 | 1 |   |   |   | <b>2</b> |
| <b>h76</b>  |   |  |  |  |   |   |   | 1 |   |   |   |   | <b>1</b> |
| <b>h77</b>  |   |  |  |  |   |   |   | 1 |   |   |   |   | <b>1</b> |
| <b>h78</b>  |   |  |  |  |   |   |   | 2 |   |   |   |   | <b>2</b> |
| <b>h79</b>  |   |  |  |  |   |   |   | 1 |   |   |   |   | <b>1</b> |
| <b>h80</b>  |   |  |  |  |   |   |   | 1 |   |   |   |   | <b>1</b> |
| <b>h81</b>  |   |  |  |  |   |   |   | 1 |   |   |   |   | <b>1</b> |
| <b>h82</b>  |   |  |  |  |   |   |   | 1 |   |   |   |   | <b>1</b> |
| <b>h83</b>  |   |  |  |  |   |   |   | 1 |   |   |   |   | <b>1</b> |
| <b>h84</b>  |   |  |  |  |   |   |   | 1 |   |   |   |   | <b>1</b> |
| <b>h85</b>  |   |  |  |  |   |   |   | 1 |   |   |   |   | <b>1</b> |
| <b>h86</b>  |   |  |  |  |   |   |   |   | 1 |   |   |   | <b>1</b> |
| <b>h87</b>  |   |  |  |  |   |   |   |   | 1 |   |   |   | <b>1</b> |
| <b>h88</b>  |   |  |  |  |   |   |   |   | 1 |   |   |   | <b>1</b> |
| <b>h89</b>  |   |  |  |  |   |   |   |   | 1 |   |   |   | <b>1</b> |
| <b>h90</b>  |   |  |  |  |   |   |   |   | 1 |   |   |   | <b>1</b> |
| <b>h91</b>  |   |  |  |  |   |   |   |   | 2 |   |   |   | <b>2</b> |
| <b>h92</b>  |   |  |  |  |   |   |   |   | 1 |   |   |   | <b>1</b> |
| <b>h93</b>  |   |  |  |  |   |   |   |   | 1 |   |   |   | <b>1</b> |
| <b>h94</b>  |   |  |  |  |   |   |   |   | 1 |   |   |   | <b>1</b> |
| <b>h95</b>  |   |  |  |  |   |   |   |   | 1 |   |   |   | <b>1</b> |
| <b>h96</b>  |   |  |  |  |   |   |   |   | 1 |   |   |   | <b>1</b> |
| <b>h97</b>  |   |  |  |  |   |   |   |   | 1 |   |   |   | <b>1</b> |
| <b>h98</b>  |   |  |  |  |   |   |   |   | 1 |   |   |   | <b>1</b> |
| <b>h99</b>  |   |  |  |  |   |   |   |   | 1 |   |   |   | <b>1</b> |
| <b>h100</b> |   |  |  |  |   |   |   |   |   | 1 |   |   | <b>1</b> |
| <b>h101</b> |   |  |  |  |   |   |   |   |   | 1 |   |   | <b>1</b> |
| <b>h102</b> |   |  |  |  |   |   |   |   |   | 1 |   |   | <b>1</b> |
| <b>h103</b> |   |  |  |  |   |   |   |   |   | 1 |   |   | <b>1</b> |
| <b>h104</b> |   |  |  |  |   |   |   |   |   | 1 |   |   | <b>1</b> |
| <b>h105</b> |   |  |  |  |   |   |   |   |   | 1 |   |   | <b>1</b> |
| <b>h106</b> |   |  |  |  |   |   |   |   |   | 2 |   | 1 | <b>3</b> |
| <b>h107</b> |   |  |  |  |   |   |   |   |   | 1 |   |   | <b>1</b> |
| <b>h108</b> |   |  |  |  |   |   |   |   |   | 1 |   |   | <b>1</b> |
| <b>h109</b> |   |  |  |  |   |   |   |   |   | 1 |   |   | <b>1</b> |

|             |           |           |           |           |           |           |           |           |           |           |           |           |            |
|-------------|-----------|-----------|-----------|-----------|-----------|-----------|-----------|-----------|-----------|-----------|-----------|-----------|------------|
| <b>h110</b> |           |           |           |           |           |           |           |           |           | 1         |           |           | <b>1</b>   |
| <b>h111</b> |           |           |           |           |           |           |           |           |           | 1         |           |           | <b>1</b>   |
| <b>h112</b> |           |           |           |           |           |           |           |           |           | 1         |           |           | <b>1</b>   |
| <b>h113</b> |           |           |           |           |           |           |           |           |           | 1         |           |           | <b>1</b>   |
| <b>h114</b> |           |           |           |           |           |           |           |           |           | 1         |           |           | <b>1</b>   |
| <b>h115</b> |           |           |           |           |           |           |           |           |           | 1         |           |           | <b>1</b>   |
| <b>h116</b> |           |           |           |           |           |           |           |           |           | 1         |           |           | <b>1</b>   |
| <b>h117</b> |           |           |           |           |           |           |           |           |           |           | 1         |           | <b>1</b>   |
| <b>h118</b> |           |           |           |           |           |           |           |           |           |           | 1         |           | <b>1</b>   |
| <b>h119</b> |           |           |           |           |           |           |           |           |           |           | 1         |           | <b>1</b>   |
| <b>h120</b> |           |           |           |           |           |           |           |           |           |           | 1         |           | <b>1</b>   |
| <b>h121</b> |           |           |           |           |           |           |           |           |           |           | 1         |           | <b>1</b>   |
| <b>h122</b> |           |           |           |           |           |           |           |           |           |           | 2         |           | <b>2</b>   |
| <b>h123</b> |           |           |           |           |           |           |           |           |           |           | 1         |           | <b>1</b>   |
| <b>h124</b> |           |           |           |           |           |           |           |           |           |           | 1         |           | <b>1</b>   |
| <b>h125</b> |           |           |           |           |           |           |           |           |           |           | 1         |           | <b>1</b>   |
| <b>h126</b> |           |           |           |           |           |           |           |           |           |           |           | 1         | <b>1</b>   |
| <b>h127</b> |           |           |           |           |           |           |           |           |           |           |           | 1         | <b>1</b>   |
| <b>h128</b> |           |           |           |           |           |           |           |           |           |           |           | 1         | <b>1</b>   |
| <b>h129</b> |           |           |           |           |           |           |           |           |           |           |           | 1         | <b>1</b>   |
| <b>h130</b> |           |           |           |           |           |           |           |           |           |           |           | 1         | <b>1</b>   |
| <b>h131</b> |           |           |           |           |           |           |           |           |           |           |           | 1         | <b>1</b>   |
| <b>h132</b> |           |           |           |           |           |           |           |           |           |           |           | 1         | <b>1</b>   |
| <b>h133</b> |           |           |           |           |           |           |           |           |           |           |           | 1         | <b>1</b>   |
| <b>h134</b> |           |           |           |           |           |           |           |           |           |           |           | 1         | <b>1</b>   |
| <b>h135</b> |           |           |           |           |           |           |           |           |           |           |           | 1         | <b>1</b>   |
| <b>h136</b> |           |           |           |           |           |           |           |           |           |           |           | 1         | <b>1</b>   |
| <b>h137</b> |           |           |           |           |           |           |           |           |           |           |           | 1         | <b>1</b>   |
|             | <b>23</b> | <b>18</b> | <b>10</b> | <b>10</b> | <b>10</b> | <b>10</b> | <b>10</b> | <b>16</b> | <b>20</b> | <b>20</b> | <b>11</b> | <b>16</b> | <b>174</b> |

**Supplementary Table S3.** Tamura-Nei genetic distance matrix of 12 MG populations: between (below) and within populations (in diagonal).

|             | INT          | LTS          | LOG          | ERD          | MGG          | MZG          | NOM          | BOG          | MAN          | BGN          | ALT          | Ref.         |
|-------------|--------------|--------------|--------------|--------------|--------------|--------------|--------------|--------------|--------------|--------------|--------------|--------------|
| <b>INT</b>  | <b>0.034</b> |              |              |              |              |              |              |              |              |              |              |              |
| <b>LTS</b>  | 0.029        | <b>0.020</b> |              |              |              |              |              |              |              |              |              |              |
| <b>LOG</b>  | 0.035        | 0.032        | <b>0.036</b> |              |              |              |              |              |              |              |              |              |
| <b>ERD</b>  | 0.031        | 0.023        | 0.034        | <b>0.022</b> |              |              |              |              |              |              |              |              |
| <b>MGG</b>  | 0.034        | 0.027        | 0.037        | 0.029        | <b>0.034</b> |              |              |              |              |              |              |              |
| <b>MZG</b>  | 0.029        | 0.021        | 0.031        | 0.023        | 0.027        | <b>0.022</b> |              |              |              |              |              |              |
| <b>NOM</b>  | 0.034        | 0.028        | 0.037        | 0.029        | 0.033        | 0.028        | <b>0.035</b> |              |              |              |              |              |
| <b>BOG</b>  | 0.028        | 0.021        | 0.030        | 0.024        | 0.027        | 0.021        | 0.028        | <b>0.021</b> |              |              |              |              |
| <b>MAN</b>  | 0.033        | 0.027        | 0.035        | 0.029        | 0.033        | 0.027        | 0.033        | 0.027        | <b>0.033</b> |              |              |              |
| <b>BGN</b>  | 0.029        | 0.021        | 0.032        | 0.022        | 0.027        | 0.021        | 0.027        | 0.021        | 0.027        | <b>0.021</b> |              |              |
| <b>ALT</b>  | 0.036        | 0.032        | 0.039        | 0.032        | 0.037        | 0.032        | 0.036        | 0.032        | 0.036        | 0.031        | <b>0.040</b> |              |
| <b>Ref.</b> | 0.036        | 0.030        | 0.039        | 0.032        | 0.035        | 0.030        | 0.035        | 0.030        | 0.035        | 0.030        | 0.039        | <b>0.039</b> |

**Supplementary Table S4.** Shared haplotypes among Mongolian goats and those from other countries

| Haplotypes     | Shared animals                                    | No. of animals | Populations                         |
|----------------|---------------------------------------------------|----------------|-------------------------------------|
| hap-2          | mng02, 08, 116                                    | 3              | 2IKN, 1MAN                          |
| hap-12         | mng13, ref-1                                      | 2              | 1IKN, 1Ref.                         |
| hap-14         | mng15, 18                                         | 2              | 2IKN                                |
| hap-17         | mng19, 137                                        | 2              | 1IKN, 1BGN                          |
| hap-19         | mng21, 103, 122, 123                              | 4              | 1IKN, 1BOG, 2MAN                    |
| hap-22         | mng24, 25                                         | 2              | 2LTS                                |
| hap-23         | mng26, 31                                         | 2              | 2LTS                                |
| hap-27         | mng30, 36, 40                                     | 3              | 2LTS                                |
| hap-29         | mng33, 35                                         | 2              | 2LTS                                |
| hap-34         | mng41, 87                                         | 2              | 1LOG, 1NOM                          |
| hap-35         | mng42, 106                                        | 2              | 1LOG, 1NOG                          |
| hap-36         | mng43, 49                                         | 2              | 2LOG                                |
| hap-38         | mng45, ref-2                                      | 2              | 1LOG, 1Ref.                         |
| hap-45         | mng53, 54, 150                                    | 3              | 2ERD, 1ALT                          |
| hap-47         | mng56, 60                                         | 2              | 2ERD                                |
| hap-49         | mng58, 59                                         | 2              | 2ERD                                |
| hap-52         | mng63, mng147                                     | 2              | 1MGG, 1BGN                          |
| hap-56         | mng67, ref-3                                      | 2              | 1MGG, 1Ref.                         |
| hap-58         | mng69, mng86                                      | 2              | 1MGG, 1NOM                          |
| <b>hap-60</b>  | <b>mng71, mng79, mng90, 91 hua, lei, SNW, SNW</b> | <b>8</b>       | <b>INT, MZG, NOM, HUA, LEI, SNW</b> |
| hap-66         | mng77, mng92, 100                                 | 3              | 1MZG, 2BOG                          |
| hap-74         | mng88, 89                                         | 2              | 2NOM                                |
| hap-75         | mng93, 119                                        | 2              | 1BOG, 1MAN                          |
| hap-78         | mng96, 107                                        | 2              | 1BOG, 1MAN                          |
| <b>hap-88</b>  | <b>mng110, hua, hua, KNG</b>                      | <b>4</b>       | <b>MAN, HUA, KNG</b>                |
| hap-91         | mng114, 115                                       | 2              | 2MAN                                |
| hap-106        | mng134, 144, ref-4                                | 3              | 2BGN, 1Ref.                         |
| <b>hap-118</b> | <b>mng149, hua</b>                                | <b>2</b>       | <b>1ALT, 1HUA</b>                   |
| hap-122        | mng154, 155                                       | 2              | 1ALT                                |

mng## = individual ID of Mongolian goats in this study



Supplementary Table S5. The pairwise *Fst* distance matrix among a total of 36 breeds

|        | 1     | 2     | 3     | 4    | 5     | 6     | 7     | 8    | 9     | 10    | 11    | 12    | 13   | 14   | 15    | 16   | 17   | 18   | 19   | 20    | 21   | 22   | 23    | 24   | 25   | 26   | 27   | 28   | 29   | 30   | 31   | 32   | 33   | 34   | 35   | 36  |  |  |
|--------|-------|-------|-------|------|-------|-------|-------|------|-------|-------|-------|-------|------|------|-------|------|------|------|------|-------|------|------|-------|------|------|------|------|------|------|------|------|------|------|------|------|-----|--|--|
| 1 INT  | 0.0   |       |       |      |       |       |       |      |       |       |       |       |      |      |       |      |      |      |      |       |      |      |       |      |      |      |      |      |      |      |      |      |      |      |      |     |  |  |
| 2 LTS  | 0.04  | 0.00  |       |      |       |       |       |      |       |       |       |       |      |      |       |      |      |      |      |       |      |      |       |      |      |      |      |      |      |      |      |      |      |      |      |     |  |  |
| 3 LOG  | 0.02  | 0.14  | 0.00  |      |       |       |       |      |       |       |       |       |      |      |       |      |      |      |      |       |      |      |       |      |      |      |      |      |      |      |      |      |      |      |      |     |  |  |
| 4 ERD  | 0.06  | 0.08  | 0.15  | 0.00 |       |       |       |      |       |       |       |       |      |      |       |      |      |      |      |       |      |      |       |      |      |      |      |      |      |      |      |      |      |      |      |     |  |  |
| 5 MGG  | -0.01 | 0.00  | 0.07  | 0.04 | 0.00  |       |       |      |       |       |       |       |      |      |       |      |      |      |      |       |      |      |       |      |      |      |      |      |      |      |      |      |      |      |      |     |  |  |
| 6 MZG  | 0.01  | -0.02 | 0.09  | 0.05 | -0.04 | 0.00  |       |      |       |       |       |       |      |      |       |      |      |      |      |       |      |      |       |      |      |      |      |      |      |      |      |      |      |      |      |     |  |  |
| 7 NOM  | -0.03 | 0.00  | 0.04  | 0.02 | -0.06 | -0.03 | 0.00  |      |       |       |       |       |      |      |       |      |      |      |      |       |      |      |       |      |      |      |      |      |      |      |      |      |      |      |      |     |  |  |
| 8 BOG  | -0.02 | 0.03  | 0.06  | 0.09 | -0.02 | -0.02 | 0.00  | 0.00 |       |       |       |       |      |      |       |      |      |      |      |       |      |      |       |      |      |      |      |      |      |      |      |      |      |      |      |     |  |  |
| 9 MAN  | -0.02 | 0.02  | 0.01  | 0.03 | -0.02 | -0.01 | -0.04 | 0.00 | 0.00  |       |       |       |      |      |       |      |      |      |      |       |      |      |       |      |      |      |      |      |      |      |      |      |      |      |      |     |  |  |
| 10 BGN | 0.04  | 0.01  | 0.15  | 0.01 | 0.00  | -0.02 | -0.01 | 0.03 | 0.01  | 0.00  |       |       |      |      |       |      |      |      |      |       |      |      |       |      |      |      |      |      |      |      |      |      |      |      |      |     |  |  |
| 11 ALT | -0.02 | 0.07  | 0.01  | 0.01 | 0.00  | 0.03  | -0.04 | 0.06 | -0.01 | 0.05  | -0.00 |       |      |      |       |      |      |      |      |       |      |      |       |      |      |      |      |      |      |      |      |      |      |      |      |     |  |  |
| 12 ReL | -0.02 | 0.03  | 0.04  | 0.02 | -0.04 | -0.01 | -0.05 | 0.01 | -0.02 | 0.01  | -0.02 | 0.00  |      |      |       |      |      |      |      |       |      |      |       |      |      |      |      |      |      |      |      |      |      |      |      |     |  |  |
| 13 GO  | 0.18  | 0.28  | 0.20  | 0.28 | 0.18  | 0.24  | 0.19  | 0.20 | 0.21  | 0.28  | 0.20  | 0.16  | 0.00 |      |       |      |      |      |      |       |      |      |       |      |      |      |      |      |      |      |      |      |      |      |      |     |  |  |
| 14 KG  | 0.10  | 0.17  | 0.14  | 0.18 | 0.09  | 0.13  | 0.09  | 0.09 | 0.12  | 0.17  | 0.13  | 0.09  | 0.04 | 0.00 |       |      |      |      |      |       |      |      |       |      |      |      |      |      |      |      |      |      |      |      |      |     |  |  |
| 15 TG  | 0.05  | 0.06  | 0.14  | 0.13 | 0.04  | 0.05  | 0.05  | 0.04 | 0.04  | 0.06  | 0.08  | 0.05  | 0.24 | 0.12 | 0.00  |      |      |      |      |       |      |      |       |      |      |      |      |      |      |      |      |      |      |      |      |     |  |  |
| 16 BA  | 0.08  | 0.09  | 0.16  | 0.12 | 0.03  | 0.06  | 0.07  | 0.03 | 0.07  | 0.08  | 0.11  | 0.08  | 0.22 | 0.11 | 0.05  | 0.00 |      |      |      |       |      |      |       |      |      |      |      |      |      |      |      |      |      |      |      |     |  |  |
| 17 BAT | 0.11  | 0.21  | 0.11  | 0.21 | 0.12  | 0.18  | 0.13  | 0.14 | 0.13  | 0.22  | 0.12  | 0.11  | 0.03 | 0.05 | 0.15  | 0.15 | 0.00 |      |      |       |      |      |       |      |      |      |      |      |      |      |      |      |      |      |      |     |  |  |
| 18 BE  | 0.10  | 0.12  | 0.18  | 0.15 | 0.06  | 0.11  | 0.09  | 0.07 | 0.10  | 0.13  | 0.12  | 0.09  | 0.25 | 0.12 | 0.11  | 0.06 | 0.19 | 0.00 |      |       |      |      |       |      |      |      |      |      |      |      |      |      |      |      |      |     |  |  |
| 19 AR  | 0.09  | 0.15  | 0.17  | 0.18 | 0.06  | 0.11  | 0.08  | 0.06 | 0.10  | 0.14  | 0.12  | 0.08  | 0.20 | 0.09 | 0.07  | 0.04 | 0.16 | 0.12 | 0.00 |       |      |      |       |      |      |      |      |      |      |      |      |      |      |      |      |     |  |  |
| 20 CHE | 0.08  | 0.15  | 0.13  | 0.13 | 0.08  | 0.09  | 0.04  | 0.12 | 0.09  | 0.12  | 0.06  | 0.04  | 0.15 | 0.12 | 0.16  | 0.17 | 0.14 | 0.19 | 0.15 | 0.00  |      |      |       |      |      |      |      |      |      |      |      |      |      |      |      |     |  |  |
| 21 GUB | 0.04  | 0.12  | 0.10  | 0.12 | 0.07  | 0.08  | 0.02  | 0.09 | 0.06  | 0.11  | 0.02  | 0.02  | 0.15 | 0.10 | 0.11  | 0.15 | 0.10 | 0.18 | 0.14 | -0.05 | 0.00 |      |       |      |      |      |      |      |      |      |      |      |      |      |      |     |  |  |
| 22 NUA | 0.09  | 0.19  | 0.19  | 0.04 | 0.06  | 0.07  | 0.05  | 0.13 | 0.04  | 0.05  | 0.08  | 0.04  | 0.33 | 0.24 | 0.16  | 0.18 | 0.29 | 0.23 | 0.23 | 0.18  | 0.20 | 0.00 |       |      |      |      |      |      |      |      |      |      |      |      |      |     |  |  |
| 23 LEI | 0.22  | 0.33  | 0.27  | 0.22 | 0.22  | 0.27  | 0.18  | 0.31 | 0.23  | 0.27  | 0.18  | 0.16  | 0.28 | 0.28 | 0.34  | 0.35 | 0.29 | 0.37 | 0.33 | 0.05  | 0.12 | 0.28 | 0.00  |      |      |      |      |      |      |      |      |      |      |      |      |     |  |  |
| 24 SNW | 0.14  | 0.20  | 0.22  | 0.10 | 0.12  | 0.15  | 0.09  | 0.21 | 0.14  | 0.13  | 0.10  | 0.08  | 0.27 | 0.23 | 0.24  | 0.25 | 0.25 | 0.26 | 0.25 | 0.03  | 0.09 | 0.14 | 0.01  | 0.00 |      |      |      |      |      |      |      |      |      |      |      |     |  |  |
| 25 KNG | 0.14  | 0.21  | 0.24  | 0.05 | 0.15  | 0.19  | 0.10  | 0.26 | 0.10  | 0.12  | 0.09  | 0.07  | 0.38 | 0.30 | 0.30  | 0.33 | 0.34 | 0.38 | 0.36 | 0.17  | 0.20 | 0.03 | 0.20  | 0.08 | 0.00 |      |      |      |      |      |      |      |      |      |      |     |  |  |
| 26 MJ  | 0.16  | 0.21  | 0.29  | 0.28 | 0.16  | 0.23  | 0.17  | 0.18 | 0.17  | 0.22  | 0.24  | 0.16  | 0.26 | 0.18 | 0.20  | 0.19 | 0.23 | 0.27 | 0.22 | 0.26  | 0.25 | 0.30 | 0.42  | 0.32 | 0.45 | 0.00 |      |      |      |      |      |      |      |      |      |     |  |  |
| 27 dDS | 0.21  | 0.34  | 0.31  | 0.37 | 0.27  | 0.36  | 0.26  | 0.31 | 0.22  | 0.33  | 0.26  | 0.19  | 0.36 | 0.30 | 0.25  | 0.37 | 0.31 | 0.48 | 0.35 | 0.31  | 0.28 | 0.42 | 0.42  | 0.37 | 0.52 | 0.43 | 0.00 |      |      |      |      |      |      |      |      |     |  |  |
| 28 GER | 0.17  | 0.27  | 0.29  | 0.32 | 0.21  | 0.28  | 0.22  | 0.23 | 0.18  | 0.26  | 0.22  | 0.15  | 0.32 | 0.24 | 0.14  | 0.28 | 0.27 | 0.37 | 0.27 | 0.28  | 0.24 | 0.36 | 0.43  | 0.36 | 0.48 | 0.40 | 0.10 | 0.00 |      |      |      |      |      |      |      |     |  |  |
| 29 ML  | 0.16  | 0.29  | 0.28  | 0.34 | 0.23  | 0.31  | 0.21  | 0.26 | 0.17  | 0.28  | 0.22  | 0.14  | 0.32 | 0.25 | 0.17  | 0.32 | 0.29 | 0.42 | 0.30 | 0.27  | 0.24 | 0.37 | 0.42  | 0.36 | 0.51 | 0.38 | 0.10 | 0.05 | 0.00 |      |      |      |      |      |      |     |  |  |
| 30 PN  | 0.14  | 0.20  | 0.25  | 0.30 | 0.15  | 0.23  | 0.16  | 0.19 | 0.14  | 0.23  | 0.20  | 0.13  | 0.24 | 0.18 | 0.21  | 0.21 | 0.20 | 0.29 | 0.26 | 0.25  | 0.25 | 0.32 | 0.43  | 0.33 | 0.50 | 0.02 | 0.48 | 0.44 | 0.45 | 0.00 |      |      |      |      |      |     |  |  |
| 31 IG  | 0.03  | 0.08  | 0.07  | 0.07 | -0.03 | 0.02  | -0.02 | 0.04 | 0.02  | 0.05  | 0.01  | -0.02 | 0.14 | 0.09 | 0.07  | 0.09 | 0.10 | 0.13 | 0.08 | 0.01  | 0.01 | 0.11 | 0.11  | 0.06 | 0.14 | 0.18 | 0.22 | 0.19 | 0.20 | 0.19 | 0.00 |      |      |      |      |     |  |  |
| 32 ING | 0.53  | 0.68  | 0.57  | 0.71 | 0.61  | 0.69  | 0.61  | 0.65 | 0.56  | 0.68  | 0.56  | 0.52  | 0.31 | 0.48 | 0.69  | 0.69 | 0.44 | 0.73 | 0.68 | 0.50  | 0.54 | 0.73 | 0.56  | 0.60 | 0.78 | 0.70 | 0.74 | 0.73 | 0.76 | 0.72 | 0.51 | 0.00 |      |      |      |     |  |  |
| 33 LOG | 0.32  | 0.45  | 0.35  | 0.37 | 0.33  | 0.39  | 0.29  | 0.42 | 0.34  | 0.41  | 0.28  | 0.26  | 0.33 | 0.36 | 0.47  | 0.46 | 0.36 | 0.49 | 0.42 | 0.10  | 0.19 | 0.43 | -0.02 | 0.11 | 0.37 | 0.53 | 0.52 | 0.54 | 0.54 | 0.53 | 0.19 | 0.58 | 0.00 |      |      |     |  |  |
| 34 PG  | 0.09  | 0.20  | 0.08  | 0.14 | 0.08  | 0.14  | 0.05  | 0.15 | 0.10  | 0.18  | 0.05  | 0.06  | 0.14 | 0.15 | 0.20  | 0.19 | 0.12 | 0.21 | 0.17 | 0.03  | 0.05 | 0.18 | 0.04  | 0.08 | 0.15 | 0.27 | 0.25 | 0.27 | 0.25 | 0.24 | 0.01 | 0.37 | 0.08 | 0.00 |      |     |  |  |
| 35 Kag | -0.03 | -0.01 | 0.07  | 0.03 | -0.05 | -0.03 | -0.05 | 0.00 | -0.03 | -0.01 | -0.02 | -0.05 | 0.18 | 0.05 | -0.05 | 0.03 | 0.11 | 0.06 | 0.05 | 0.06  | 0.04 | 0.07 | 0.25  | 0.13 | 0.20 | 0.17 | 0.26 | 0.15 | 0.18 | 0.18 | 0.00 | 0.69 | 0.37 | 0.10 | 0.00 |     |  |  |
| 36 Kyg | 0.04  | 0.19  | -0.02 | 0.19 | 0.10  | 0.16  | 0.09  | 0.13 | 0.05  | 0.20  | 0.05  | 0.09  | 0.20 | 0.17 | 0.19  | 0.19 | 0.11 | 0.28 | 0.21 | 0.14  | 0.10 | 0.24 | 0.26  | 0.22 | 0.28 | 0.32 | 0.31 | 0.31 | 0.32 | 0.29 | 0.08 | 0.56 | 0.33 | 0.06 | 0.13 | 0.0 |  |  |

Highlighted area indicated *Fst* values among MG populations

Highlighted area indicated *Fst* values among MG populations and foreign breeds

Highlighted area indicated no important *Fst* values among foreign breeds
